# Supplementary material for: Gut microbiota Modulated by Probiotics and Garcinia cambogia Extract Correlate with Weight Gain and Adipocyte Sizes in High Fat-Fed Mice
Source: PubMed Central journal article supplement (PMC5034228; doi:10.1038/srep33566), 2016-09-23
Supplement: srep33566-s1.pdf [file srep33566-s1.pdf]

# **Gut microbiota Modulated by Probiotics and *Garcinia cambogia* Extract Correlate with Weight Gain and Adipocyte Sizes in High Fat-Fed Mice**

**Jaeyoung Heo<sup>1\*</sup>, Minseok Seo<sup>1,2\*</sup>, Hwanhee Park<sup>3</sup>, Woon Kyu Lee<sup>3</sup>, Le Luo Guan<sup>4</sup>, Joon Yoon<sup>2</sup>, Kelsey Caetano-Anolles<sup>5</sup>, Hyeonju Ahn<sup>5</sup>, Yoon-Mo Kang<sup>6</sup>, Se-Young Kim<sup>6</sup>, Seoae Cho<sup>1§</sup>, Heebal Kim<sup>1,2,5§</sup>**

<sup>1</sup>C&K genomics, Seoul National University Research Park, Seoul 151-919, Republic of Korea.

<sup>2</sup>Interdisciplinary Program in Bioinformatics, Seoul National University, Seoul 151-742, Republic of Korea.

<sup>3</sup>Laboratory of Developmental Genetics, Department of Biomedical Sciences, Inha University School of Medicine, Incheon 22212, Republic of Korea<sup>4</sup>Department of Agricultural, Food and Nutritional Science, University of Alberta, Edmonton, Alberta T6G 2P5, Canada.

<sup>5</sup>Department of Agricultural Biotechnology and Research Institute of Agriculture and Life Sciences, Seoul National University, Seoul 151-921, Republic of Korea.

<sup>6</sup>R&D center, CTCBIO, Inc. 38, Hyundaiakia-ro, Paltan-myeon, Hwaseong-si, Gyeonggi-do, 18576, Republic of Korea

<sup>¶</sup>These authors contributed equally to this work

<sup>§</sup> Corresponding author

Heebal Kim : Tel: +82-2-880-4803, Fax: +82-2-883-8812 ; E-mail : heebal@snu.ac.kr

Seoae Cho : Tel: +82-2-876-8820, Fax: +82-2-876-8827 ; E-mail : seoae@cnkgenomic.com

## Contents for supplementary materials

|                                                                                                                                        |    |
|----------------------------------------------------------------------------------------------------------------------------------------|----|
| Fig. S1. Dietary intervention affects adipocyte size as well as body weight in mice.<br>.....                                          | 3  |
| Fig. S2. Significantly observed gut microbial OTUs from the DAM analysis.....                                                          | 4  |
| Fig. S3. Significantly detected gut microbial OTUs from the TAM analysis. ....                                                         | 5  |
| Fig. S4. Schematic diagram of DAM and TAM analysis.....                                                                                | 6  |
| <br>                                                                                                                                   |    |
| Table S1. Formula of low fat diet (LFD) and high fat diet (HFD). ....                                                                  | 7  |
| Table S2. Dietary intervention effects on body weight in mice for 9 weeks (g). ....                                                    | 8  |
| Table S3. Dietary intervention effects on body weight gain and fat mass<br>accumulation. ....                                          | 9  |
| Table S4. Spearman correlation between <i>C. aminophilum</i> and other commonly<br>identified bacteria from DAM and TAM analysis. .... | 10 |
| <br>                                                                                                                                   |    |
| Method S1. Supplementary Methods.....                                                                                                  | 12 |

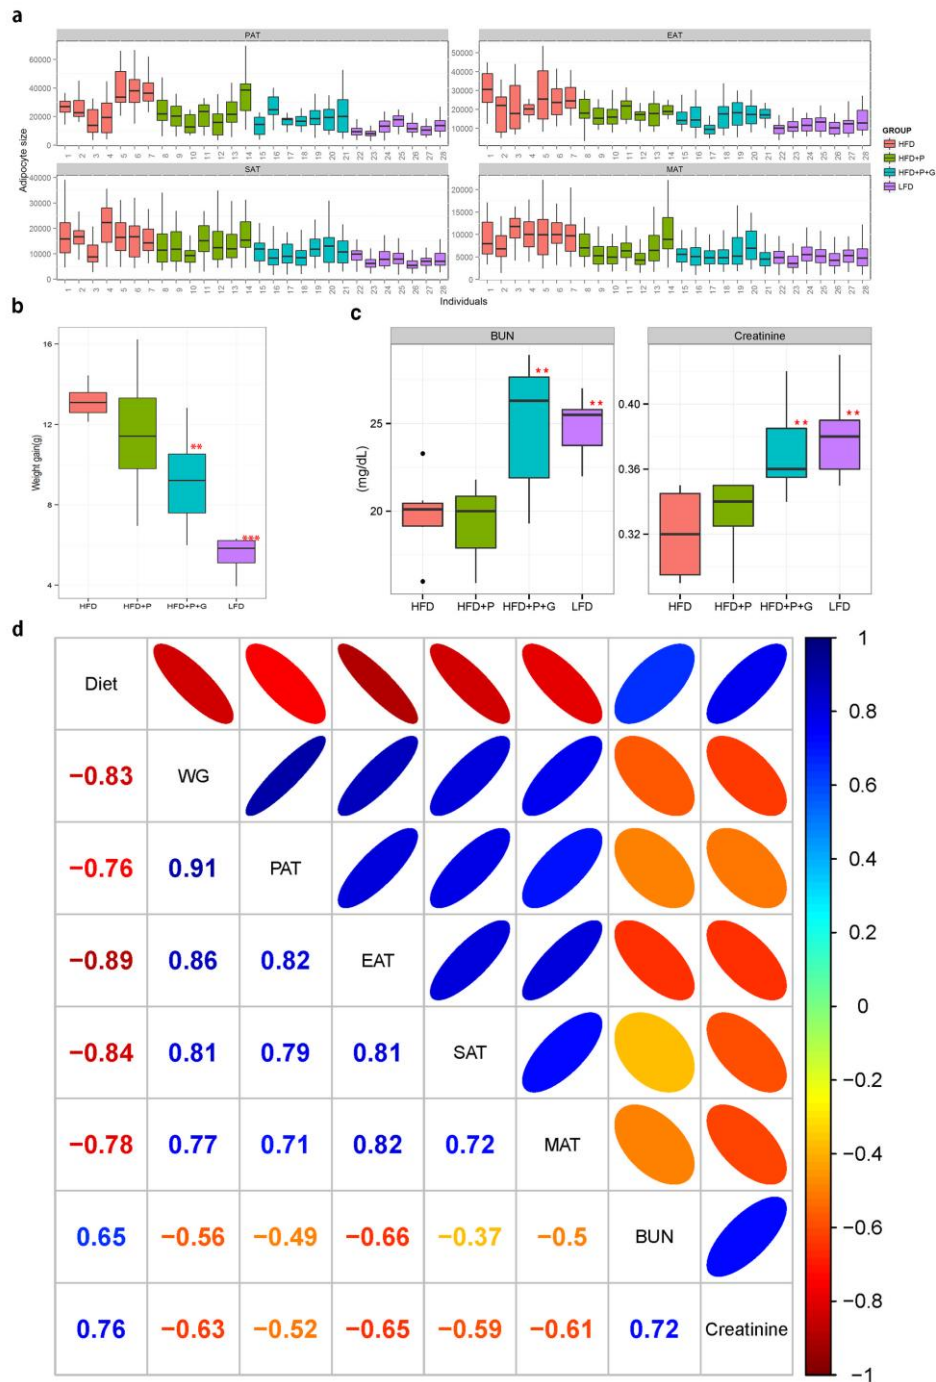

**Fig. S1. Dietary intervention affects adipocyte size as well as body weight in mice.**

(a) Individual level box-plot using repeatedly measured adipocyte size. (b) The box plot for weight gain responding to diet intervention (9 weeks). (c) Box-plots of serum blood urea nitrogen (BUN) and creatinine responding to diet (n=7). Data are represented as the mean  $\pm$  SEM. Pairwise t-test was employed for significance test from HFD-fed animals (\*P < 0.05, \*\*P < 0.01, \*\*\*P < 0.001). (d) A correlation plot is composed of 8 variables including diet information (Diet), weight gain (WG), four adipocyte mean sizes (PAT, EAT, SAT, MAT), BUN and creatinine. Dietary information was coded in the following order (HFD = 1, HFD+P = 2, HFD+P+G = 3, and LFD = 4).

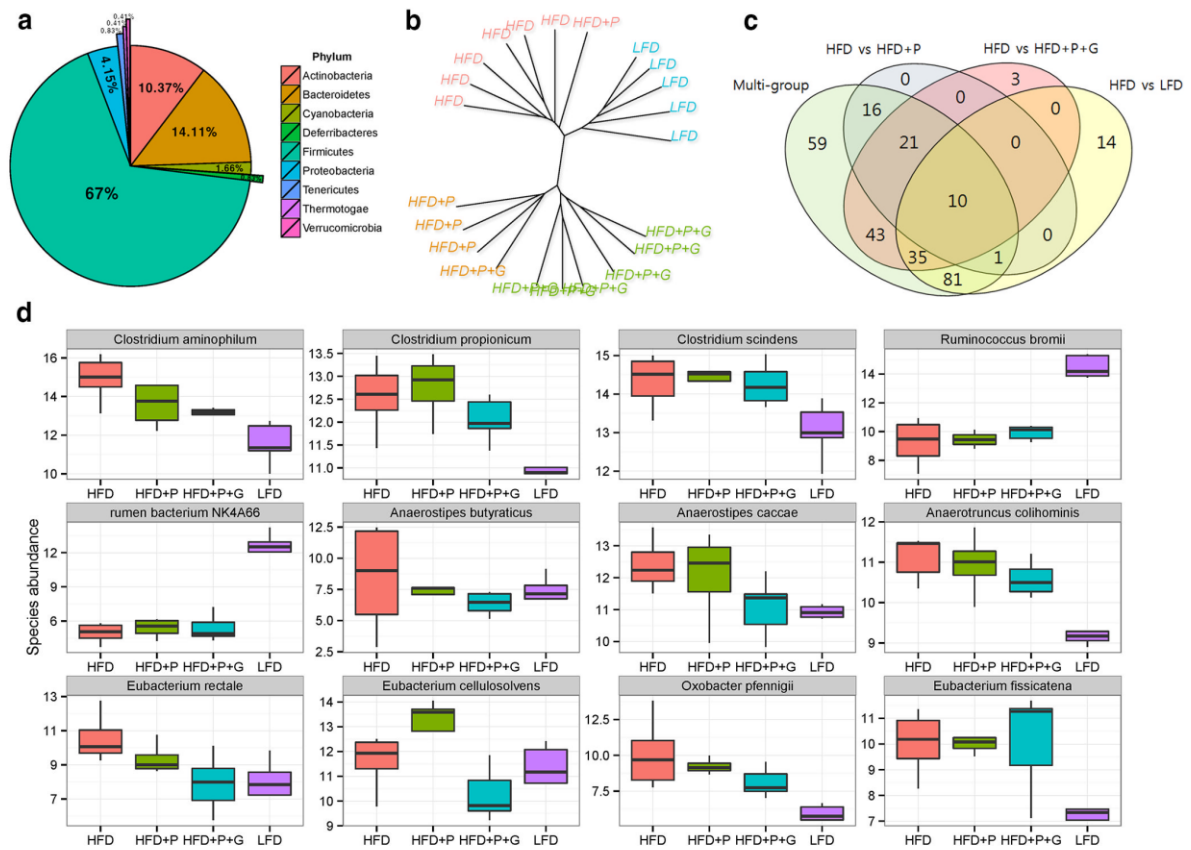

**Fig. S2. Significantly observed gut microbial OTUs from the DAM analysis.**

(a) Pie-chart of the phylum proportion from the 266 significantly detected OTUs at the species level in multi-group test and their annotated information in phylum level. Pie-charts depict mean standardized phylum abundance (% of total) responding to diet. Small proportioned phyla (<1%) were excluded in these pie charts. (b) Tree visualization based on the hierarchical clustering with cutting criteria;  $k=4$ , using 266 significantly detected species in multi-group test (FDR adjusted  $P < 0.05$ ). (c) Venn diagram of detected species in four types of hypothesis tests: multi-group test, HFD vs HFD+P, HFD vs HFD+P+G, and HFD vs LFD group comparisons. (d) Box-plots of diet susceptible bacterial species.

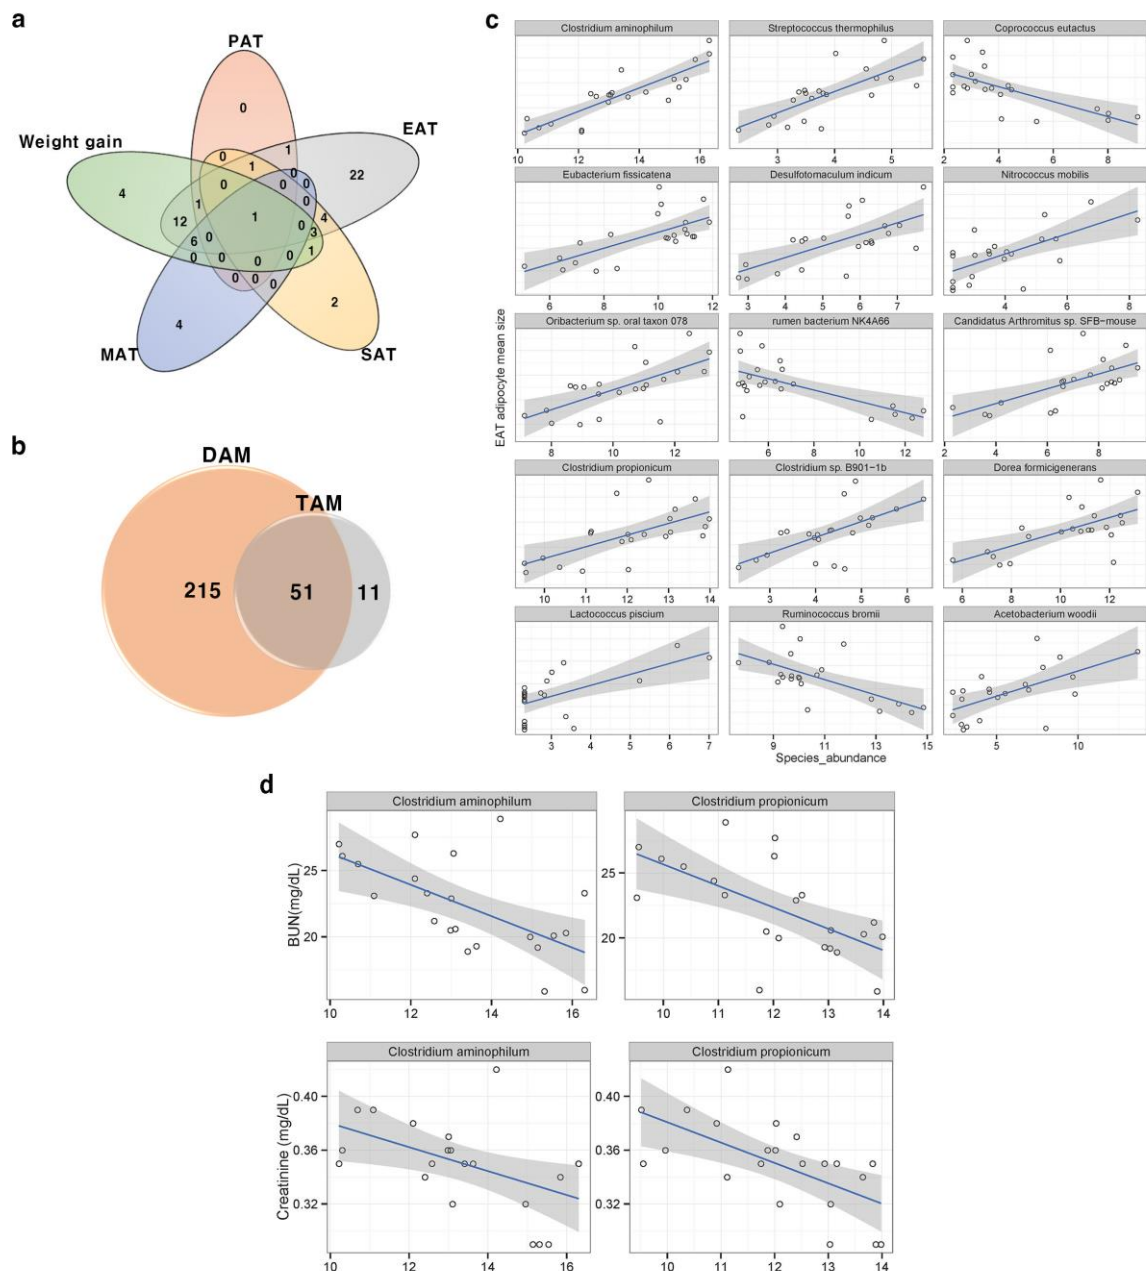

**Fig. S3. Significantly detected gut microbial OTUs from the TAM analysis.**

(a) Venn-diagram comparing significantly detected species numbers in TAM analysis between species abundance and five obesity traits such as weight gain (WG) and four kinds of adipocyte mean sizes (PAT, EAT, SAT and MAT), respectively. (b) Venn-diagram comparing significantly detected species between DAM and TAM analyses. (c) Scatter plots with fitted-line of linear regression using 15 significantly detected EAT associated species in TAM analysis with FDR adjusted  $P < 0.1$ . The blue line is fitted line in linear regression and gray region represents standard errors. (d) Scatter plots with fitted-line of linear regression. The blue line is fitted line in linear regression and gray region represents standard errors. *Clostridium aminophilum* and *C. propionicum* are significantly associated with BUN ( $P = 0.0021$  and  $0.0016$ , respectively) and creatinine ( $P = 0.0168$  and  $0.0018$ , respectively). Serum blood urea nitrogen (BUN) and creatinine are negatively associated with the abundance of ammonia-producing bacteria.

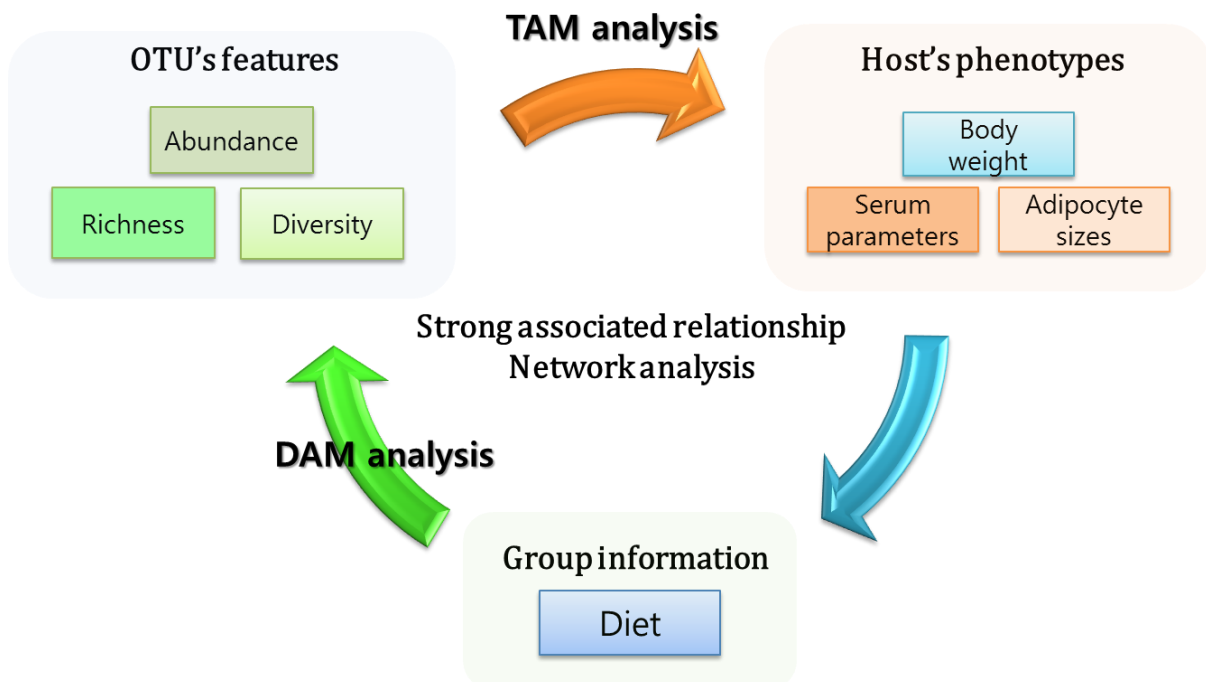

**Fig. S4. Schematic diagram of DAM and TAM analysis.**

**Table S1. Formula of low fat diet (LFD) and high fat diet (HFD).**

| <b>Product No.</b>                    | <b>D12450B (LFD)</b> |              | <b>D12492 (HFD)</b> |              |
|---------------------------------------|----------------------|--------------|---------------------|--------------|
| <b>Energy composition</b>             | <b>g%</b>            | <b>Kcal%</b> | <b>g%</b>           | <b>Kcal%</b> |
| Protein                               | 19.2                 | 20.0         | 26                  | 20           |
| Carbohydrate                          | 67.3                 | 70.0         | 26                  | 20           |
| Fat                                   | 4.3                  | 10.0         | 35                  | 60           |
| Total                                 | -                    | 100.0        | -                   | 100.0        |
| Kcal/g                                | 3.85                 | -            | 5.24                | -            |
| <b>Ingredient</b>                     | <b>g</b>             | <b>Kcal</b>  | <b>g</b>            | <b>Kcal</b>  |
| Casein                                | 200                  | 800          | 200                 | 800          |
| L-Cystine                             | 3                    | 12           | 3                   | 12           |
| Corn starch                           | 315                  | 1260         | 0                   | 0            |
| Maltodextrin 10                       | 35                   | 140          | 125                 | 500          |
| Sucrose                               | 350                  | 1400         | 68.8                | 275          |
| Cellulose, BW200                      | 50                   | 0            | 50                  | 0            |
| Soybean oil                           | 25                   | 225          | 25                  | 225          |
| Lard                                  | 20                   | 180          | 245                 | 2205         |
| Mineral mix S10026                    | 10                   | 0            | 10                  | 0            |
| Dicalcium phosphate                   | 13                   | 0            | 13                  | 0            |
| Calcium carbonate                     | 5.5                  | 0            | 5.5                 | 0            |
| Potassium citrate, 1 H <sub>2</sub> O | 16.5                 | 0            | 16.5                | 0            |
| Vitamin mix V10001                    | 10                   | 40           | 10                  | 40           |
| Choline bitartrate                    | 2                    | 0            | 2                   | 0            |
| FD&C yellow dye #5                    | 0.05                 | 0            | 0                   | 0            |
| FD&C blue dye #1                      | 0                    | 0            | 0.05                | 0            |
| <b>Total</b>                          | 1055.05              | 4057         | 773.85              | 4057         |

**Table S2. Dietary intervention effects on body weight in mice for 9 weeks (g).**

| <b>Weeks</b> | <b>HFD</b> | <b>HFD+P</b> | <b>HFD+P+G</b> | <b>LFD</b>    |
|--------------|------------|--------------|----------------|---------------|
| <b>0</b>     | 21.59±0.38 | 21.51±0.30   | 21.29±0.35     | 21.56±0.36    |
| <b>1</b>     | 21.89±0.46 | 22.11±0.29   | 21.70±0.38     | 21.71±0.42    |
| <b>2</b>     | 22.98±0.59 | 22.97±0.47   | 22.83±0.51     | 21.74±0.40*   |
| <b>3</b>     | 23.95±0.72 | 24.39±0.50   | 23.75±0.65     | 22.35±0.43    |
| <b>4</b>     | 26.27±0.72 | 26.04±0.66   | 25.03±0.62     | 23.51±0.45**  |
| <b>5</b>     | 28.24±0.79 | 27.32±0.79   | 26.16±0.79     | 23.96±0.45*** |
| <b>6</b>     | 29.84±0.76 | 28.64±0.88   | 27.26±1.01*    | 24.77±0.52*** |
| <b>7</b>     | 31.98±0.72 | 30.22±1.01   | 28.46±1.24*    | 25.44±0.63*** |
| <b>8</b>     | 33.70±0.71 | 32.02±1.15   | 29.43±1.23**   | 26.44±0.63*** |
| <b>9</b>     | 34.73±0.65 | 33.06±1.28   | 30.46±1.21**   | 27.09±0.63*** |

Male C57BL/6J mice were fed a low fat diet (LFD), a high fat diet (HFD), a HFD with 500mg/kg BW of probiotics mixture (HFD+P) or a HFD with Probiotics mixture + 1,000mg/kg BW of *Garcinia cambogia* extract (HFD+P+G) for 9 weeks. Body weight was significantly smaller in LFD mice after 4 weeks and HFD+P+G mice after 6 weeks, respectively. Data are represented as the mean ± SEM and were analyzed using pairwise t-test (n=7 in each group). \*P<0.05, \*\*P<0.01, \*\*\*P<0.001 compared with HFD fed mice.



**Table S3. Dietary intervention effects on body weight gain and fat mass accumulation.**

|                                                                      | <b>HFD</b>       | <b>HFD+P</b>      | <b>HFD+P+G</b>    | <b>LFD</b>         |
|----------------------------------------------------------------------|------------------|-------------------|-------------------|--------------------|
| <b>Body weight gain (g)</b>                                          | 13.14±0.32       | 11.54±1.17        | 9.18±0.91**       | 5.53±0.33***       |
| <b>Perirenal fat pad mass (%)</b>                                    | 2.34±0.22        | 1.92±0.2          | 2.01±0.19         | 1.19±0.13**        |
| <b>Epididymal fat pad mass (%)</b>                                   | 5.97±0.14        | 5.57±0.71         | 5.77±0.53         | 2.98±0.23**        |
| <b>Subcutaneous fat pad mass (%)</b>                                 | 5.76±0.29        | 4.62±0.67         | 4.58±0.31         | 2.36±0.21***       |
| <b>Mesenteric fat pad mass (%)</b>                                   | 1.11±0.07        | 1.05±0.15         | 2.04±0.63         | 0.74±0.09          |
| <b>Fat pad mass (%)</b>                                              | 15.18±0.33       | 13.15±1.64        | 14.41±1.09        | 7.27±0.63**        |
| <b>Perirenal adipocyte mean size (<math>\mu\text{m}^2</math>)</b>    | 29,984<br>±3,632 | 22,028<br>±2,464* | 18,963<br>±1,511* | 12,364<br>±1,230** |
| <b>Epididymal adipocyte mean size (<math>\mu\text{m}^2</math>)</b>   | 24,139<br>±1,722 | 18,515<br>±811**  | 16,141<br>±998*** | 11,691<br>±564***  |
| <b>Subcutaneous adipocyte mean size (<math>\mu\text{m}^2</math>)</b> | 16,125<br>±1,220 | 13,888<br>±938    | 10,869<br>±626*** | 7,757<br>±516***   |
| <b>Mesenteric adipocyte mean size (<math>\mu\text{m}^2</math>)</b>   | 9,886<br>±526    | 6,991<br>±747**   | 5,889<br>±394***  | 4,984<br>±240***   |

Four different adipocyte tissues were removed and weighed after 9 weeks. Body weight gain significantly reduced in LFD mice, HFD+P mice and HFD+P+G mice compared with HFD mice. All fat pad mass proportions and a subcutaneous fat pad mass proportion to body weight significantly reduced in LFD mice and HFD+P+G mice from HFD mice, respectively. Data are represented as the mean  $\pm$  SEM and are analyzed using pairwise t-test (n=7). \*P<0.05, \*\*P<0.01, \*\*\*P<0.001 compared with HFD fed mice.

**Table S4. Spearman correlation between *C. aminophilum* and other commonly identified bacteria from DAM and TAM analysis.**

| <b>Commonly identified species in DAM and TAM</b> | <b>Spearman's correlation</b> |
|---------------------------------------------------|-------------------------------|
| <i>Streptococcus thermophiles</i>                 | 0.824958                      |
| <i>Clostridium innocuum</i>                       | 0.76602                       |
| <i>Bacillus sp.</i>                               | 0.734613                      |
| <i>Clostridium leptum</i>                         | 0.731225                      |
| <i>Dorea formicigenerans</i>                      | 0.725579                      |
| <i>Oribacterium sp. oral taxon 078</i>            | 0.716544                      |
| <i>Desulfotomaculum indicum</i>                   | 0.715415                      |
| <i>Clostridium baratii</i>                        | 0.704122                      |
| <i>Clostridium scindens</i>                       | 0.699605                      |
| <i>anaerobic bacterium EtOH8</i>                  | 0.687156                      |
| <i>Acetobacterium woodii</i>                      | 0.683988                      |
| <i>Eubacterium fissicatena</i>                    | 0.679277                      |
| <i>Coprococcus eutactus</i>                       | 0.677806                      |
| <i>Alicyclobacillus kakegawensis</i>              | 0.67429                       |
| <i>Nitrococcus mobilis</i>                        | 0.670652                      |
| <i>Clostridium propionicum</i>                    | 0.667984                      |
| <i>Eubacterium sp. WAL 18692</i>                  | 0.647259                      |
| <i>Anaerobranca gottschalkii</i>                  | 0.643139                      |
| <i>Oxobacter pfennigii</i>                        | 0.638622                      |
| <i>Clostridium cadaveris</i>                      | 0.628458                      |
| <i>Clostridium lituseburense</i>                  | 0.623012                      |
| <i>Clostridium histolyticum</i>                   | 0.622812                      |
| <i>Ruminococcus bromii</i>                        | 0.619424                      |
| <i>Anaerotruncus colihominis</i>                  | 0.613778                      |
| <i>Streptococcus pleomorphus</i>                  | 0.613765                      |
| <i>Ethanoligenens harbinense</i>                  | 0.599097                      |
| <i>Peptoniphilus indolicus</i>                    | 0.594579                      |
| <i>Candidatus Arthromitus sp. SFB-mouse</i>       | 0.57651                       |
| <i>Eubacterium rectale</i>                        | 0.575381                      |
| <i>Eubacterium ruminantium</i>                    | 0.565217                      |
| <i>Clostridium aminobutyricum</i>                 | 0.534726                      |
| <i>Veillonella ratti</i>                          | 0.518916                      |
| <i>Tannerella forsythia</i>                       | 0.517787                      |
| <i>Sisymbrium irio</i>                            | 0.514399                      |

|                                        |          |
|----------------------------------------|----------|
| <i>rumen bacterium NK4A66</i>          | 0.499718 |
| <i>Butyricimonas synergistica</i>      | 0.499718 |
| <i>Lactobacillus sharpeae</i>          | 0.49633  |
| <i>Anaerostipes caccae</i>             | 0.483907 |
| <i>Clostridium hathewayi</i>           | 0.482778 |
| <i>Clostridium phytofermentans</i>     | 0.47939  |
| <i>Peptoniphilus asaccharolyticus</i>  | 0.469259 |
| <i>Megamonas hypermegale</i>           | 0.460192 |
| <i>Peptostreptococcus anaerobius</i>   | 0.44664  |
| <i>Lactococcus piscium</i>             | 0.432877 |
| <i>Parabacteroides distasonis</i>      | 0.411632 |
| <i>Clostridium bartlettii</i>          | 0.40227  |
| <i>Ornithobacterium rhinotracheale</i> | 0.333928 |

## **Method S1. Supplementary Methods**

In this study, 16s rRNA taxonomic analysis, using a diet-induced obesity mice experiment that consists of four diet groups, was performed in order to identify causative bacterial species related to obesity. As means of detection, two types of statistical methods were utilized: 1) identifying differentially abundant microbiota (DAM); 2) identifying obesity trait associated microbiota (TAM); and 3) comparing DAM and TAM analysis results. In addition, network analysis was employed in order to consider the comprehensive information on gut microbiota features of diet-microbe, host-microbe, and microbe-microbe.

### **Statistical analysis for finding differentially abundant microbiota (DAM) corresponding to diet**

To detect diet affected microbes, negative binomial distribution based generalized linear model was employed. Statistical methods for detecting differentially abundant biomarker are well-developed in RNA-seq field. Recent studies demonstrate applications of statistical methods in differentially abundant microbiome detection, under given conditions<sup>1,2</sup>. Applying these methods on our datasets is straightforward and reasonable, since both data (RNA-seq based transcriptome data and Miseq based microbiome data) composed with count-based  $N$  (Number of samples) by  $P$  (Number of biomarkers) matrix; the data structures are almost identical to that of previous works. Here, Negative binomial based generalized linear model (GLM) can be used to detect differentially abundant microbiota (DAM), with TMM normalization. Using these relative abundances in each microbe, Analysis of Deviance (ANODEV) can be applied in order to detect differentially abundant microbiome given conditions.

$$\log(\theta_{ijk}) = \mu_j + \tau_{ij} + \beta_{jk} \quad (\text{Eq. S1})$$

$$\log(E(OTU\ abundance)) = \mu + Diet \quad (\text{Eq. S2})$$

where,  $i$  is treatment,  $j$  is gene, and  $k$  is individual. Based on the log-link function and related linear predictor (1, 2), we can test significant changes in abundance corresponding to diet. Test results were adjusted by Benjamini-Hochberg method.

### **Statistical analysis for detecting trait associated microbiota (TAM)**

Next, simple linear regression model was used for detecting trait associated microbiota (TAM). As shown in (3), by setting the trait as response variable and abundance of microbiome as explanatory variable, we can perform association test between microbiome and obesity related traits.

$$Trait_i = \beta_0 + \beta_1 \cdot Abundance_{1i} + \varepsilon_i, \varepsilon_i \sim N(0, \sigma^2) \quad (\text{Eq. S3})$$

Under the null hypothesis,  $H_0: \beta_1 = 0$ , association tests were performed on each microbiome. Finally, p-values were adjusted by Benjamini-Hochberg method in order to consider multiple testing problem.

## References

- 1 McMurdie, P. J. & Holmes, S. Waste not, want not: why rarefying microbiome data is inadmissible. *PLoS Computational Biology* **10**, e1003531 (2014).
- 2 White, J. R., Nagarajan, N. & Pop, M. Statistical methods for detecting differentially abundant features in clinical metagenomic samples. *PLoS Computational Biology* **5**, e1000352 (2009).
